# Supplementary material
Source: PubMed Central journal article supplement (PMC3443948)
Supplement: emmm0004-0472-SD1.pdf [file emmm0004-0472-SD1.pdf]

# Supplementary Information

## Table of Contents

|                                                                             |          |
|-----------------------------------------------------------------------------|----------|
| <b>Fig. S1. Loss of Heterozygosity (LOH) of <i>TROP2</i> gene .....</b>     | <b>2</b> |
| <b>Fig. S2. N-glycosylation of Trop-2 protein .....</b>                     | <b>3</b> |
| <b>Fig. S3. Trop-2 expression suppresses the activation of AKT .....</b>    | <b>4</b> |
| <b>Fig. S4. Deletion Mapping of Trop-2 binding domain to mIGF-1 .....</b>   | <b>5</b> |
| <b>Fig. S5 Trop-2 protein modulates the activities of AKT and ERK .....</b> | <b>6</b> |

# Supplemental data

## Fig. S1

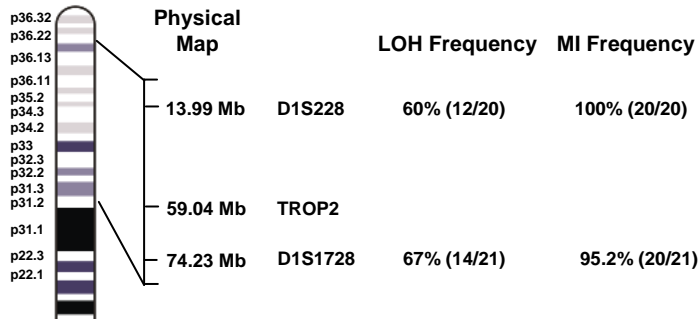

### Figure S1. Loss of Heterozygosity (LOH) of *TROP2* gene

*TROP2* is located at position of 59.04 Mb on chromosome 1p32. The two surrounding LOH markers in our LOH data are D1S228 (13.99Mb)-*TROP2* (59.04)-D1S1665 (74.23). *TROP2* is located between markers D1S228 (60%) and D1S1728 (67%), which show frequent LOH in 48 paired lung adenocarcinoma samples.

**Fig. S2**

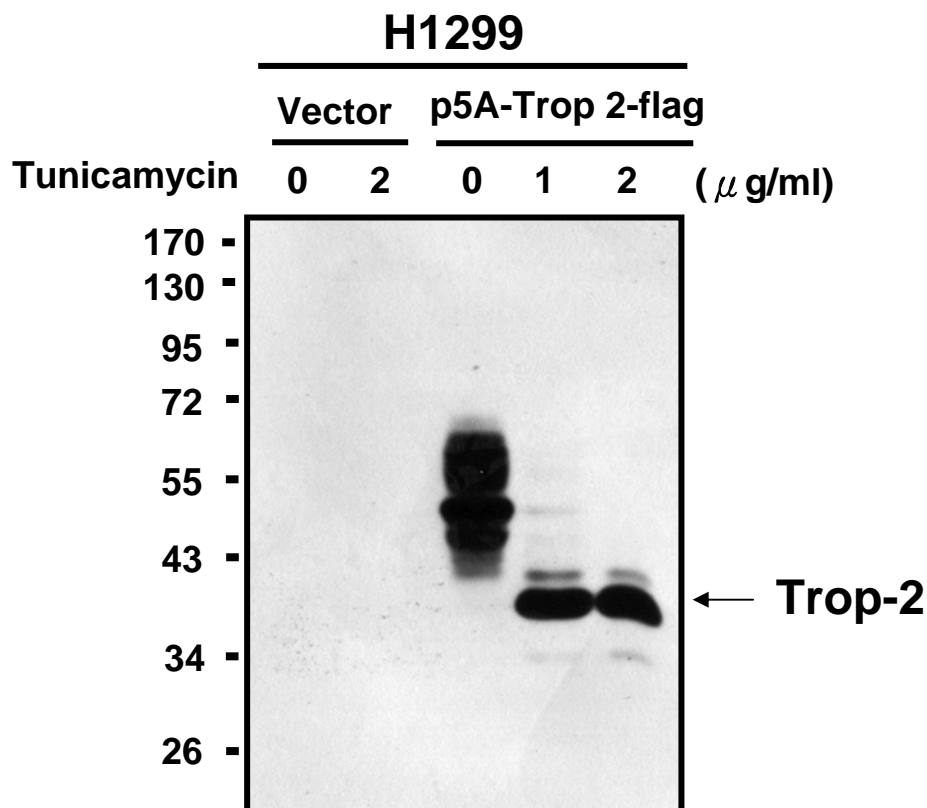

**Figure S2. N-glycosylation of Trop-2 protein**

H1299 cells were transfected with the Trop-2-flag and then treated with an N-linked glycosylation inhibitor, tunicamycin for 24 h at the indicated concentrations. The results show that multiple bands prior to tunicamycin treatment become a major single band near the predicted molecular weight, 35 kD in cells after the treatment, suggesting that the multiple bands in Western blots are related to different glycosylation.

# Fig. S3

A.

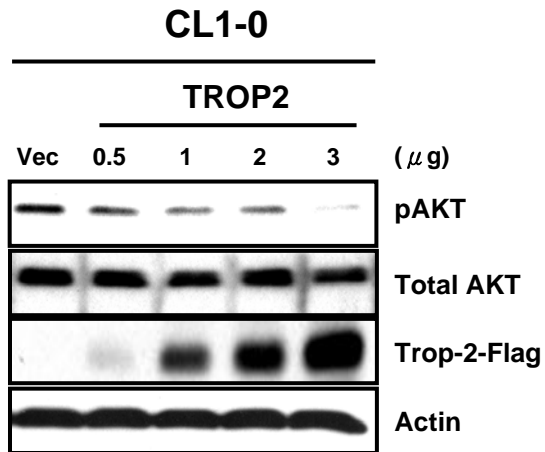

B.

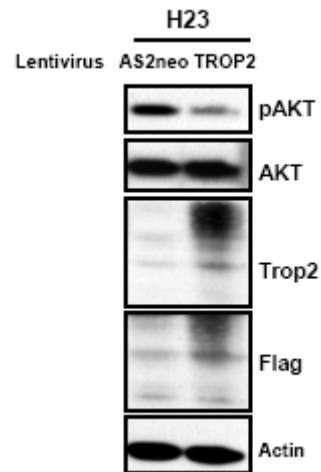

## Figure S3. Trop-2 expression suppresses the activation of AKT

Trop-2 was overexpressed in CL1-0 (A) and H23 (B) by either transfection or lentiviral transduction as indicated. The cells were harvested and separated by SDS-PAGE. The activity of AKT was determined by Western blotting with anti-pAKT.

**Fig. S4**

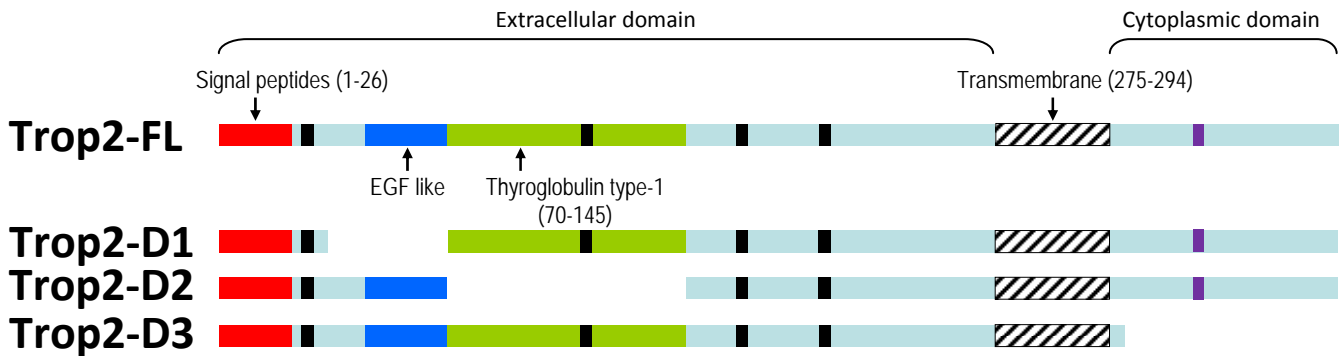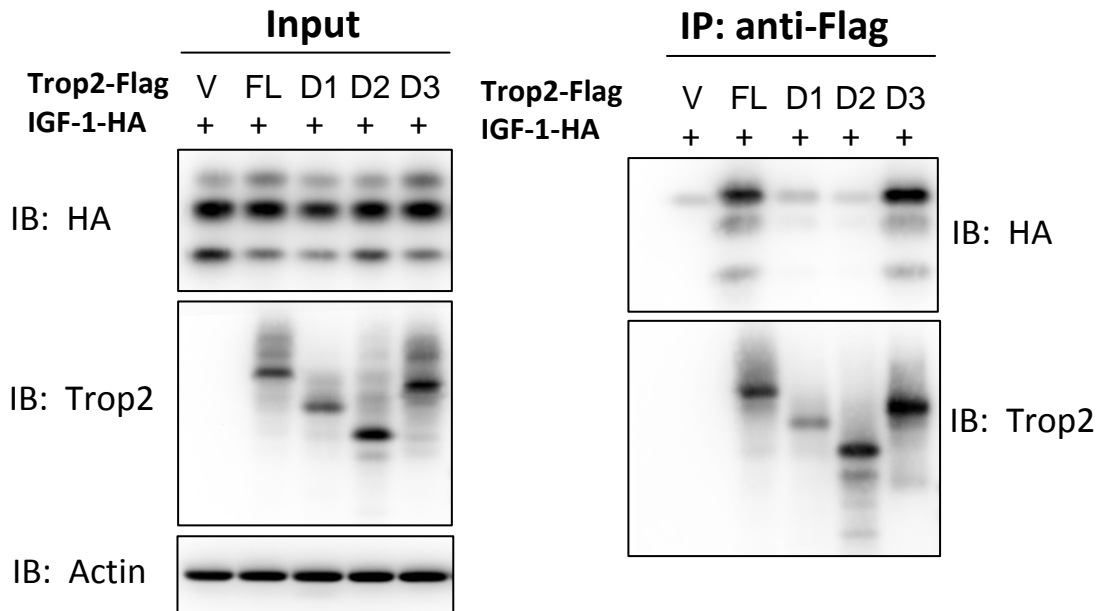

**Figure S4. Deletion Mapping of Trop-2 binding domain to mIGF-1**

Several deletion constructs of Trop-2-expressing plasmids as indicated were made. The cells were co-transfected with Trop-2-expressing and mIGF1-expressing plasmid. The lysate was incubated with anti-flag antibody and extracted by protein A Sepharose (Sigma). The protein samples were separated by SDS-PAGE, transferred to a PVDF membrane, immunoblotted with the indicated antibodies, and visualized by chemiluminescence. The results showed that loss of either EGF-like or Thyroglobulin type-1 domains would abolish the interactions between Trop-2 and mIGF-1. This result indicated that the interaction domain located on the region including EGF-like and Thyroglobulin type-1 domains. WB: western blot. IP: immunoprecipitation.

**Fig. S5**

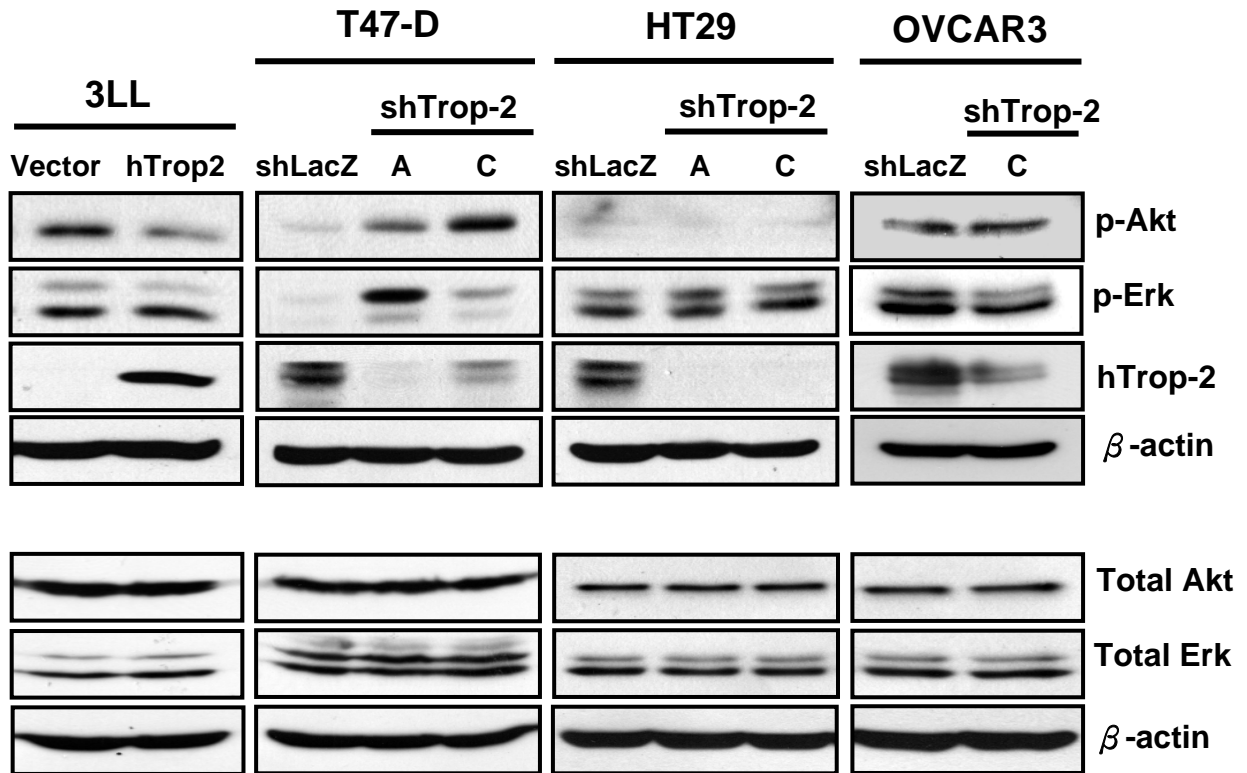

**Fig. S5 Trop-2 protein modulates the activities of AKT and ERK**

Trop-2 was overexpressed in mouse Lewis Lung Cancer Cells (3LL) which had low Trop-2 expression and Trop-2 was knock down in high Trop-2 expression cells including T47-D (mammary), HT29 (colon) and OVCAR3 (ovary) cancer cells by using lentiviral transduction as indicated. The soluble protein samples were separated by SDS-PAGE and immunoblotted with the indicated antibodies. The upper and lower panels were performed by two separate blot membranes with the same experimental condition. The results showed that Trop-2 overexpression could suppress the phosphorylation of AKT and ERK (slightly). Conversely, knockdown of Trop-2 in human breast cancer (T47-D) cells can promote the activation of AKT and ERK but there was no obvious effect on human colon cancer (HT29) and ovary cancer (OVCAR3) cells.
